# Supplementary material
Source: Springer Nature journal article supplement (https://www.springermedizin.de/resource/supplementary/12936_2013_3695_MOESM3_ESM.pdf/9546304)

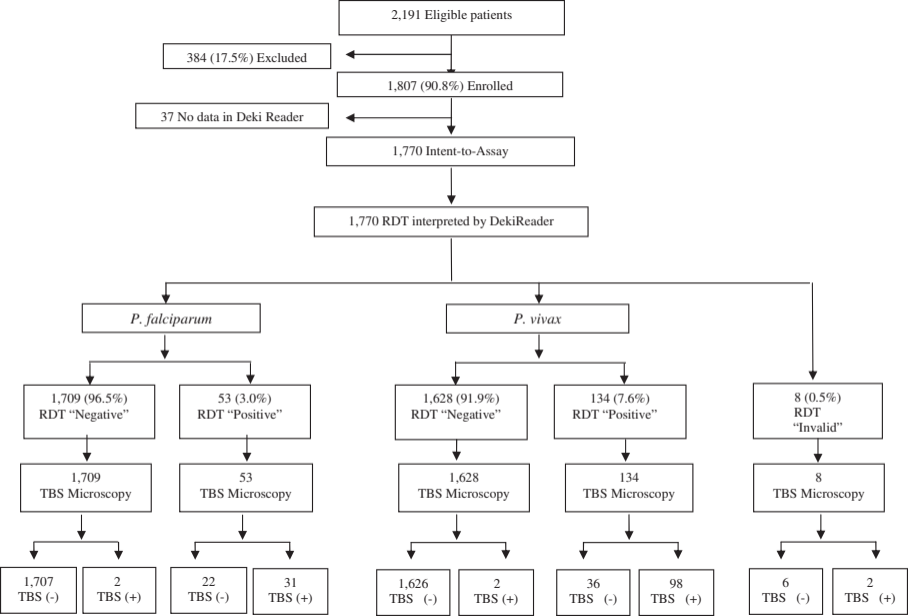

Supplement: MOESM3 [file 9546304]
